# Supplementary material for: Ultrasensitive quantification of TAP-dependent antigen compartmentalization in scarce primary immune cell subsets
Source: PubMed Central journal article supplement (PMC4347055; doi:10.1038/ncomms7199), 2015-02-06
Supplement: ncomms7199-s1.pdf [file ncomms7199-s1.pdf]

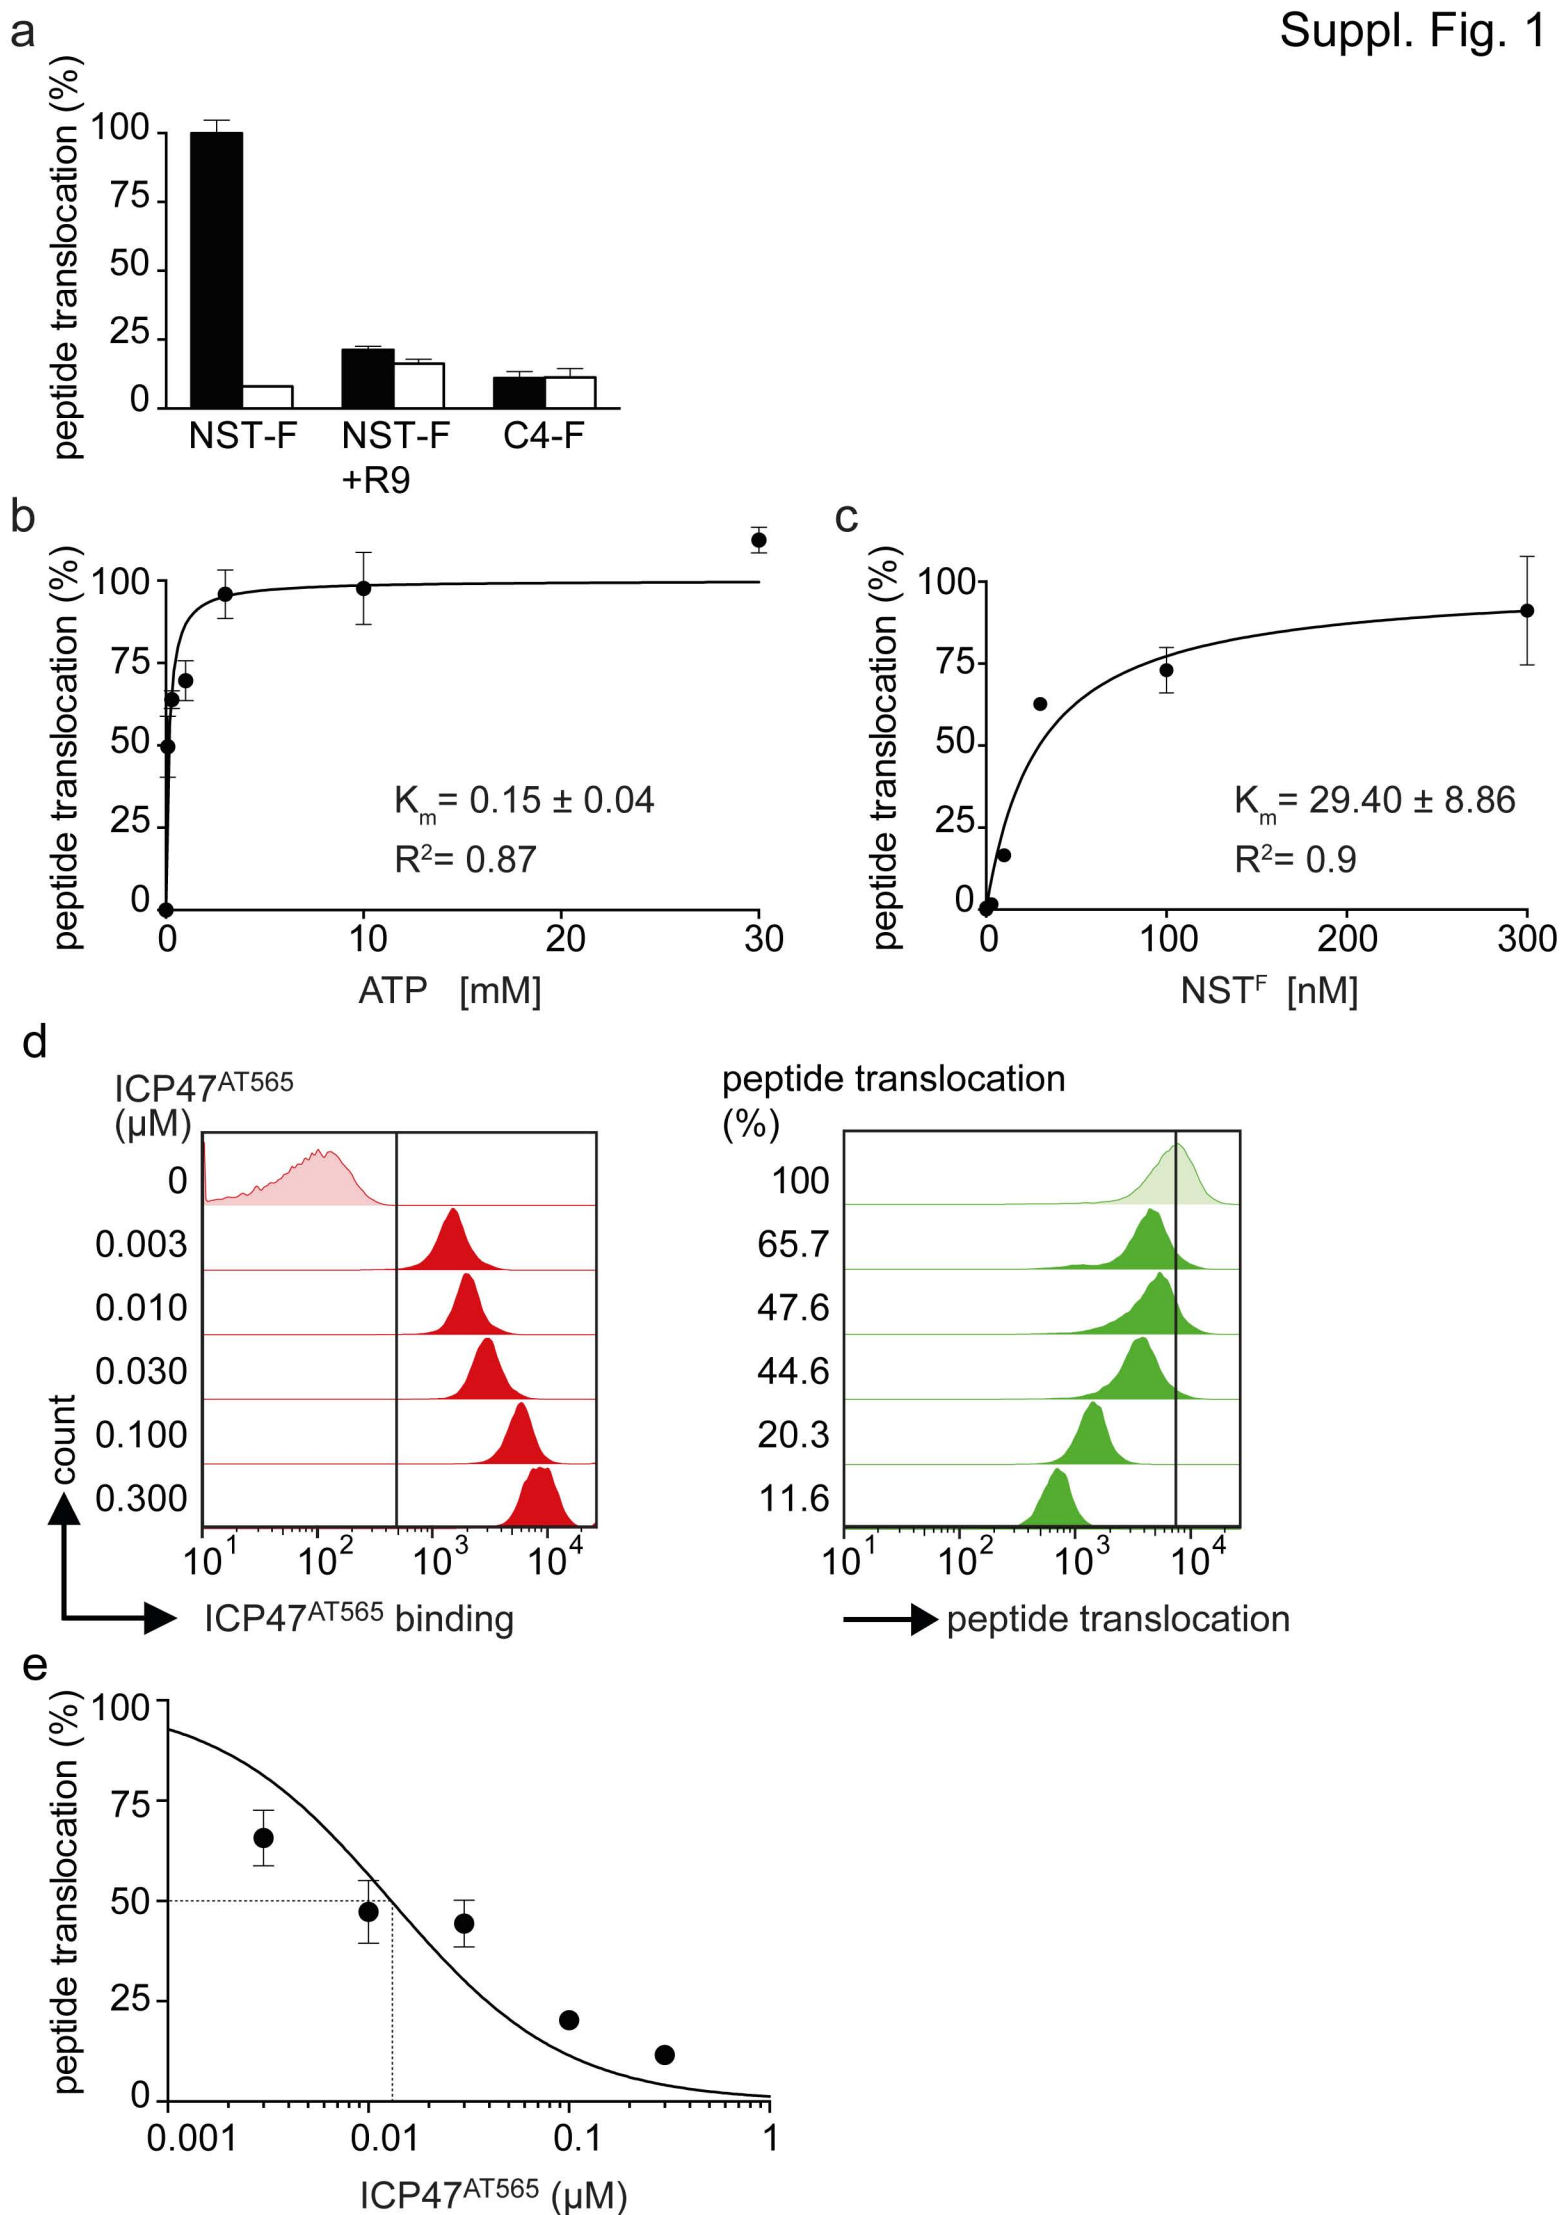

**Supplementary Figure 1 | Parameters of TAP activity in monocytes are reminiscent of those in Raji cells.**

(a) Flow cytometry-based translocation assay was carried out in monocytes in the absence or presence of 2  $\mu\text{M}$  of the high-affinity epitope R9 and a fluorescently labeled epitope lacking the N-core glycosylation site (C4-F). The detected mean fluorescence intensities (530-nm channel) were normalized to the NST-F/ATP sample. The error bars indicate the standard error of mean ( $n \geq 4$ ). (b) The TPT assay was carried out using 10 nM of reporter peptide NST-F and increasing concentrations of ATP. Translocation rates relative to the ADP control values are plotted versus ATP concentrations ( $n = 2$ ). (c) The TPT assay was carried out using 10 mM ATP and increasing concentrations of NST-F peptide. Translocation rates relative to the ADP control values are plotted versus NST-F concentrations ( $n = 2$ ). (d) Simultaneous dual flow cytometric detection of peptide translocation in the 530-nm channel (right panel) and ICP47<sup>AT565</sup> binding in the 488/575-nm channel (left panel) was carried out for increasing concentrations of ICP47<sup>AT565</sup> in monocytes. Numbers indicate the concentration of ICP47<sup>AT565</sup> in  $\mu\text{M}$  (left panel) and the mean percent of transport (right panel). As a control, peptide translocation was carried out in presence of DMSO. (e) The mean fluorescence intensities detected in the 530-nm channel were ADP background subtracted and plotted against the increasing ICP47<sup>AT565</sup> concentrations in order to determine the IC<sub>50</sub> value (13 nM with a 95% confidence interval from 9 nM to 18 nM) of ICP47<sup>AT565</sup> binding (dotted line) in monocytes. The error bars indicate the standard error of mean ( $n = 2$ ).
